# Supplementary material for: Peptide Controlled Shaping of Biomineralized Tin(II) Oxide into Flower-Like Particles
Source: MDPI journal article supplement (doi:10.3390/ma12060904), 2019-03-18
Supplement: s1 [file s1]

*Supplementary Information*

# **Peptide controlled shaping of biomineralized tin(II) oxide into flower-like particles**

**Stefan Kilper <sup>1</sup>, Timotheus Jahnke <sup>1</sup>, Katharina Wiegers <sup>1</sup>, Vera Grohe <sup>1</sup>, Zaklina Burghard <sup>1</sup>,  
Joachim Bill <sup>1</sup> and Dirk Rothenstein <sup>1,\*</sup>**

<sup>1</sup> Institute for Materials Science, University of Stuttgart, Heisenbergstraße 3, 70569 Stuttgart, Germany;

\* Correspondence: dirk.rothenstein@imw.uni-stuttgart.de; Tel.: +49 711 685 61938

Received: date; Accepted: date; Published: date

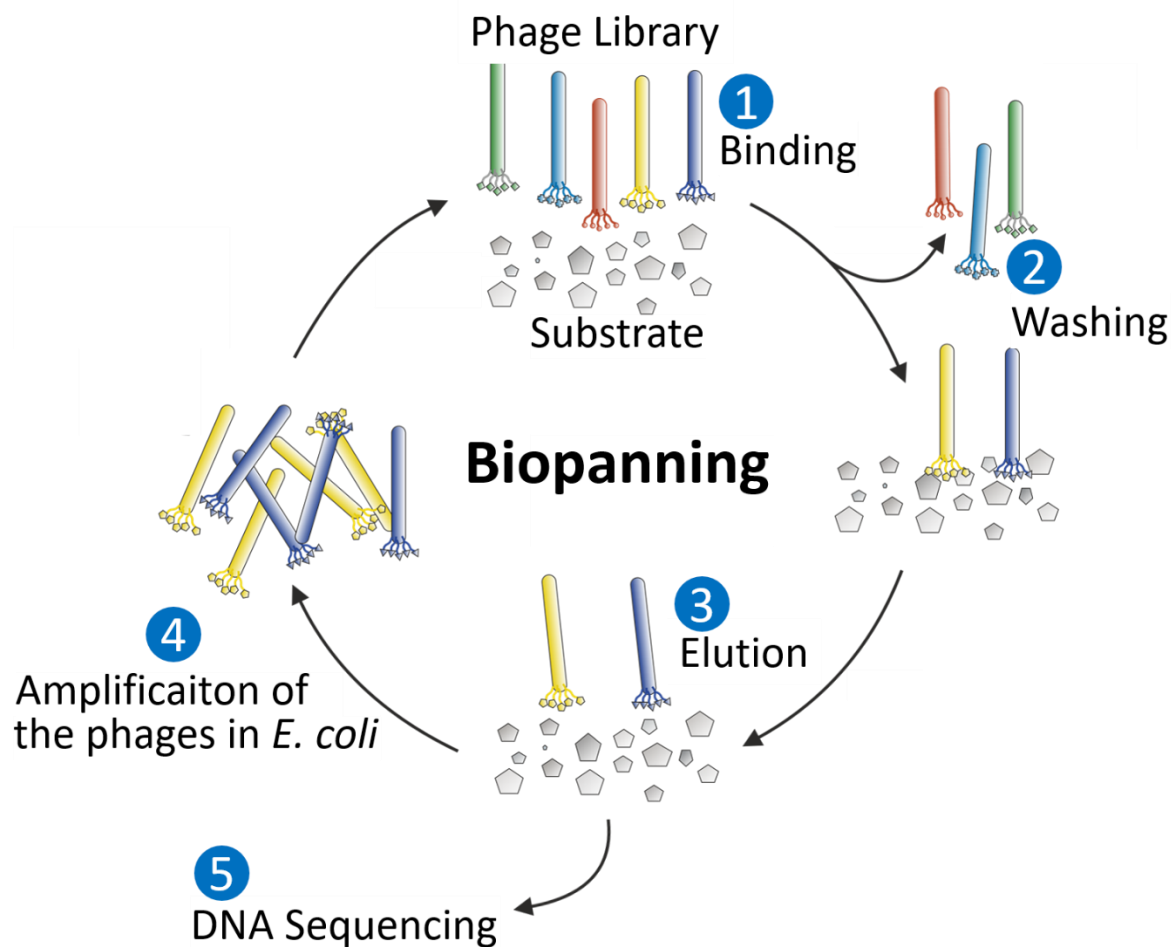

**Figure S1.** Principle of the phage display strategy for the isolation of SnO-binding peptides. Genetically engineered M13 phages express a peptide library as fusion protein with the pIII minor coat protein (Phage library). The phage-expressed peptide library is incubated with the inorganic target substrate (1). Non-binding phages are eliminated from the peptide pool by washing with appropriate buffers systems (2). Strongly bound phages are eluted by a pH shift (3). To increase the binding specificity of the peptides the eluted phages are amplified in *E. coli* (4) and the steps 1 to 3 are repeated, this procedure is called biopanning. The binding peptides are identified by DNA sequencing of the corresponding DNA section.

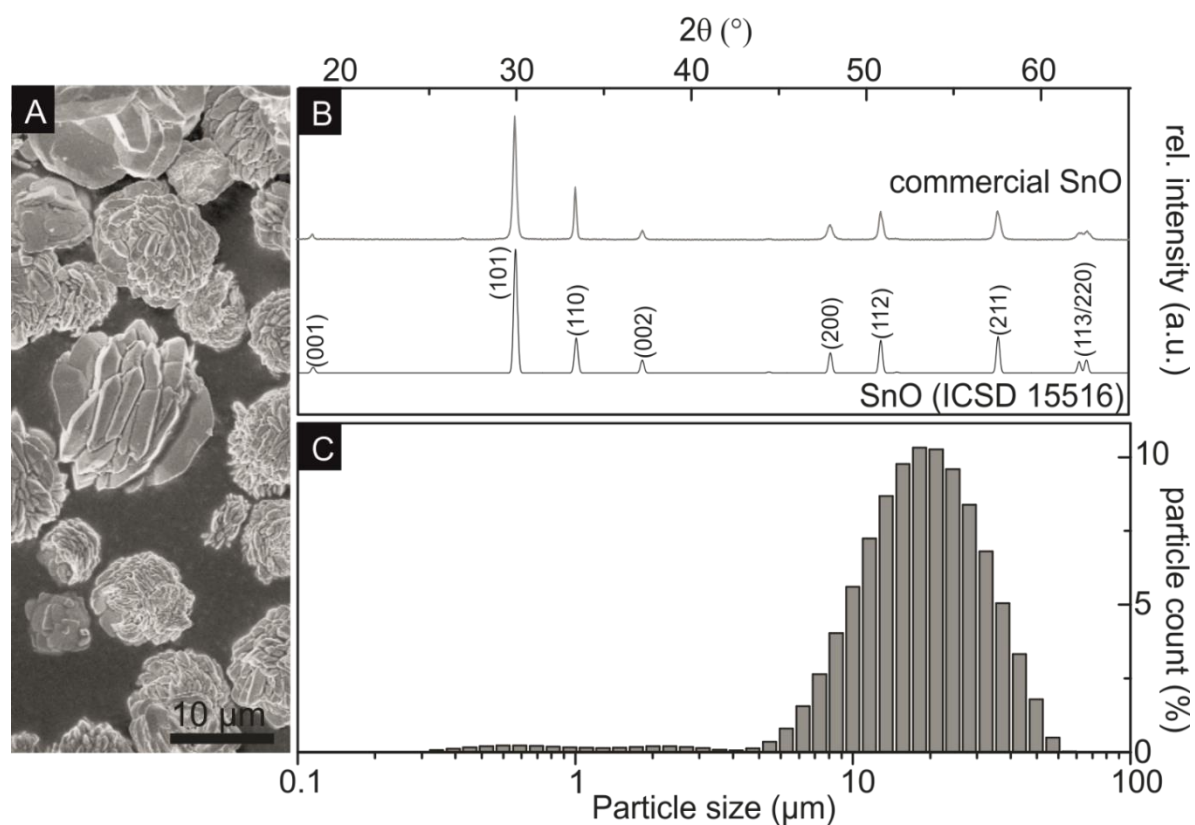

**Figure S2.** Structural characterization of the commercial SnO powder. A) SEM image of the +commercial SnO particles used for PD and Binding Assay. (B) Powder x-ray diffractogram of the commercial SnO powder. The powder x-ray data of the crystalline SnO (ICSD 15516)<sup>26</sup> used as reference. C) Particle size distribution. The particle size distribution was measured using a Mastersizer 2000 APA5005 (Malvern Instruments GmbH, Germany).

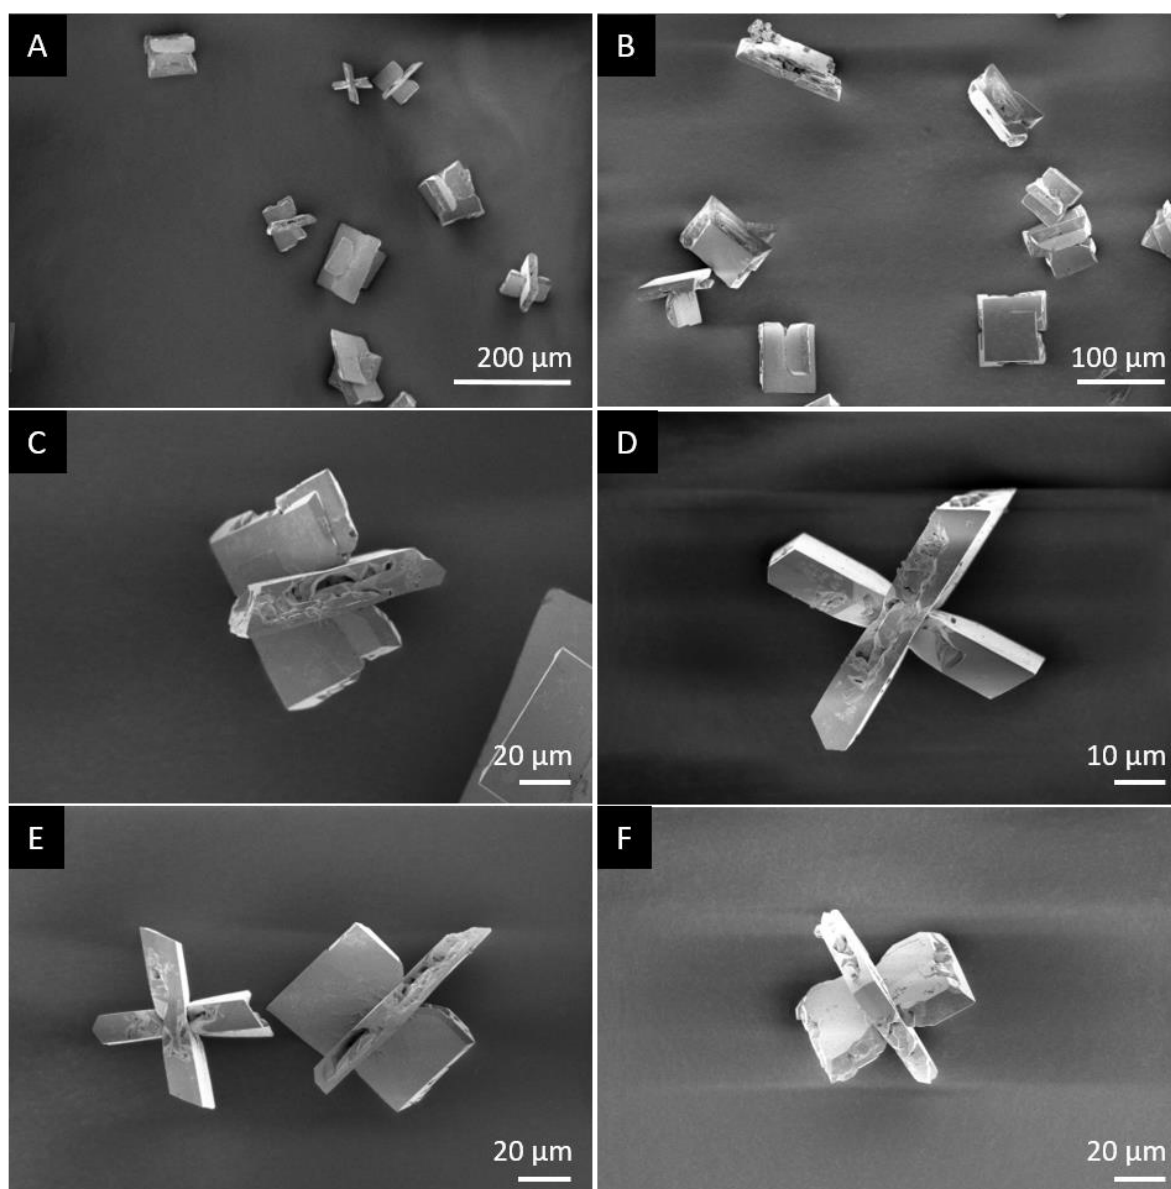

**Figure S3.** Synthesis of SnO microstructures in the absence of peptide additives. Overview micrographs (A, B) and single SnO microstructures from different experiments (C - F) under the same reaction conditions.

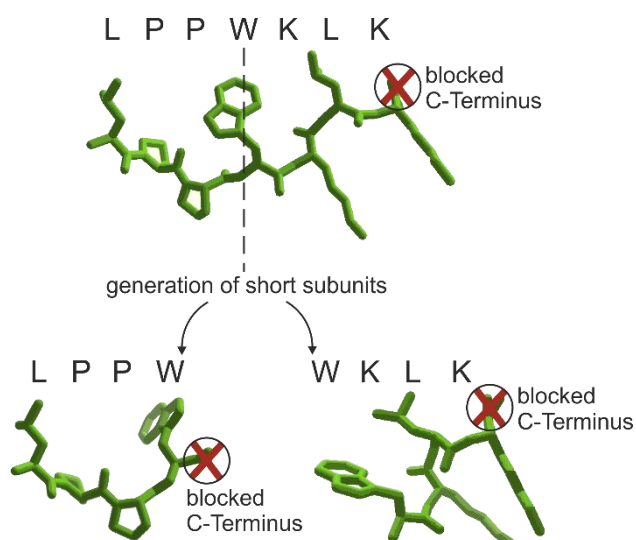

**Figure S4.** Schematic description of the construction of three solid state synthesized peptides based on the sequence of SnBP01 for the mineralization study of tin(II) oxide microstructures. Peptide SnBP01 (LPPWKLK), peptide SnBP01-1 (LPPW) and peptide SnBP01-2(WKLK). In phage display the peptides are connected by the C-Terminus to the minor coat protein p3, therefore the C-terminus of the synthesized peptides was inactivated by amidation. Structure created with Arguslab (<http://www.arguslab.com>) and refined with Foldit (<https://fold.it/portal/>).

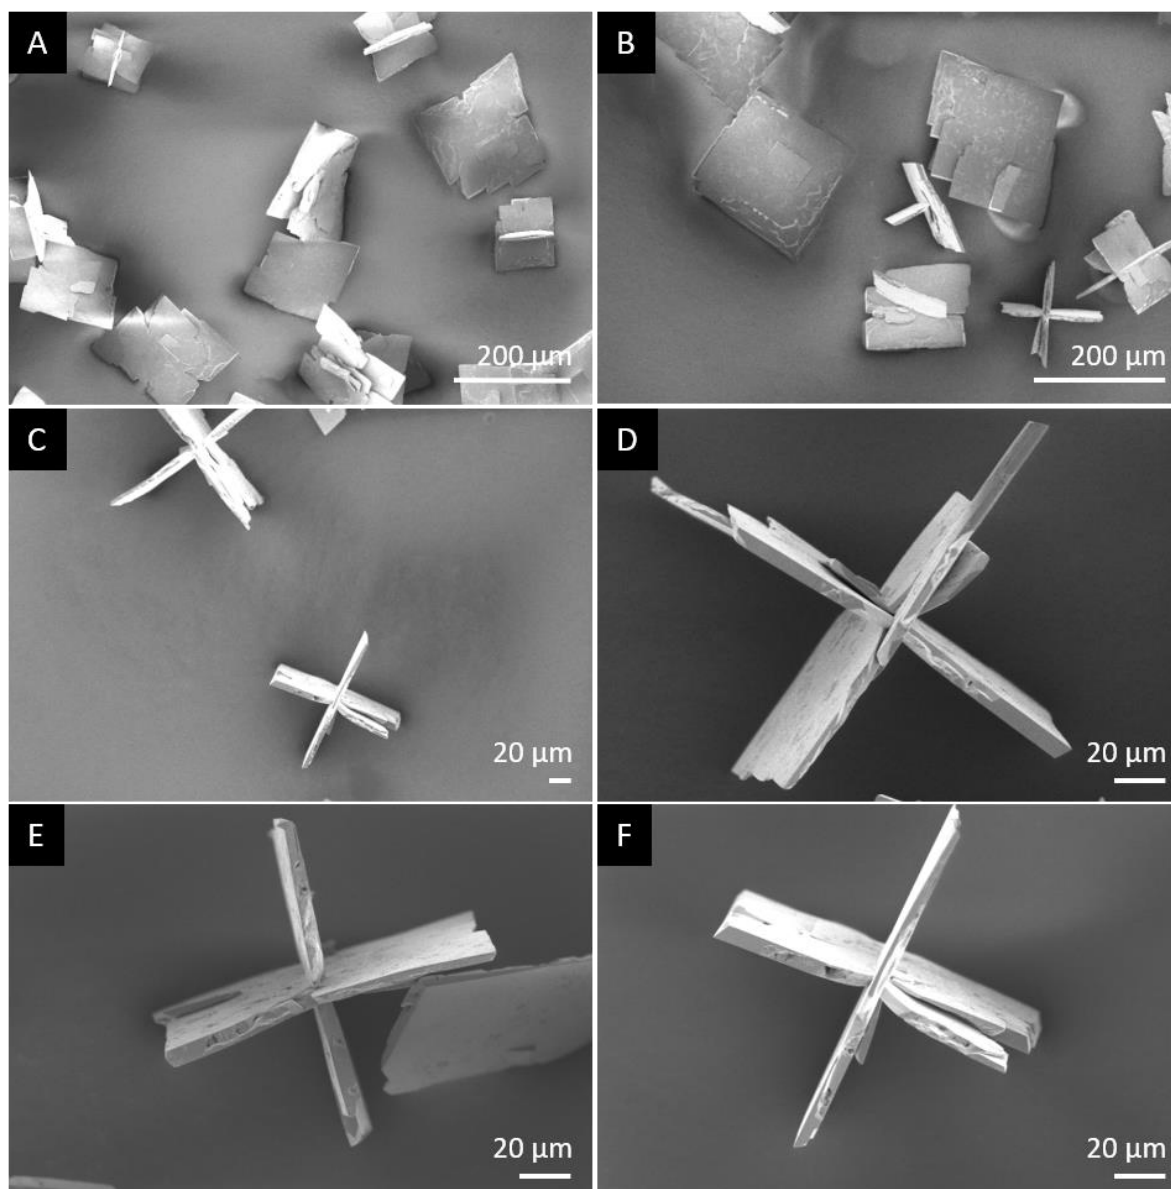

**Figure S5.** Synthesis of SnO microstructures in the presence of peptide segment SnBP01-2 (WKLK). SnO microstructures were mineralized in the presence of 1 nM peptide. Overview micrographs (A, B) and single SnO microstructures from different experiments (C - F) under the same reaction conditions.

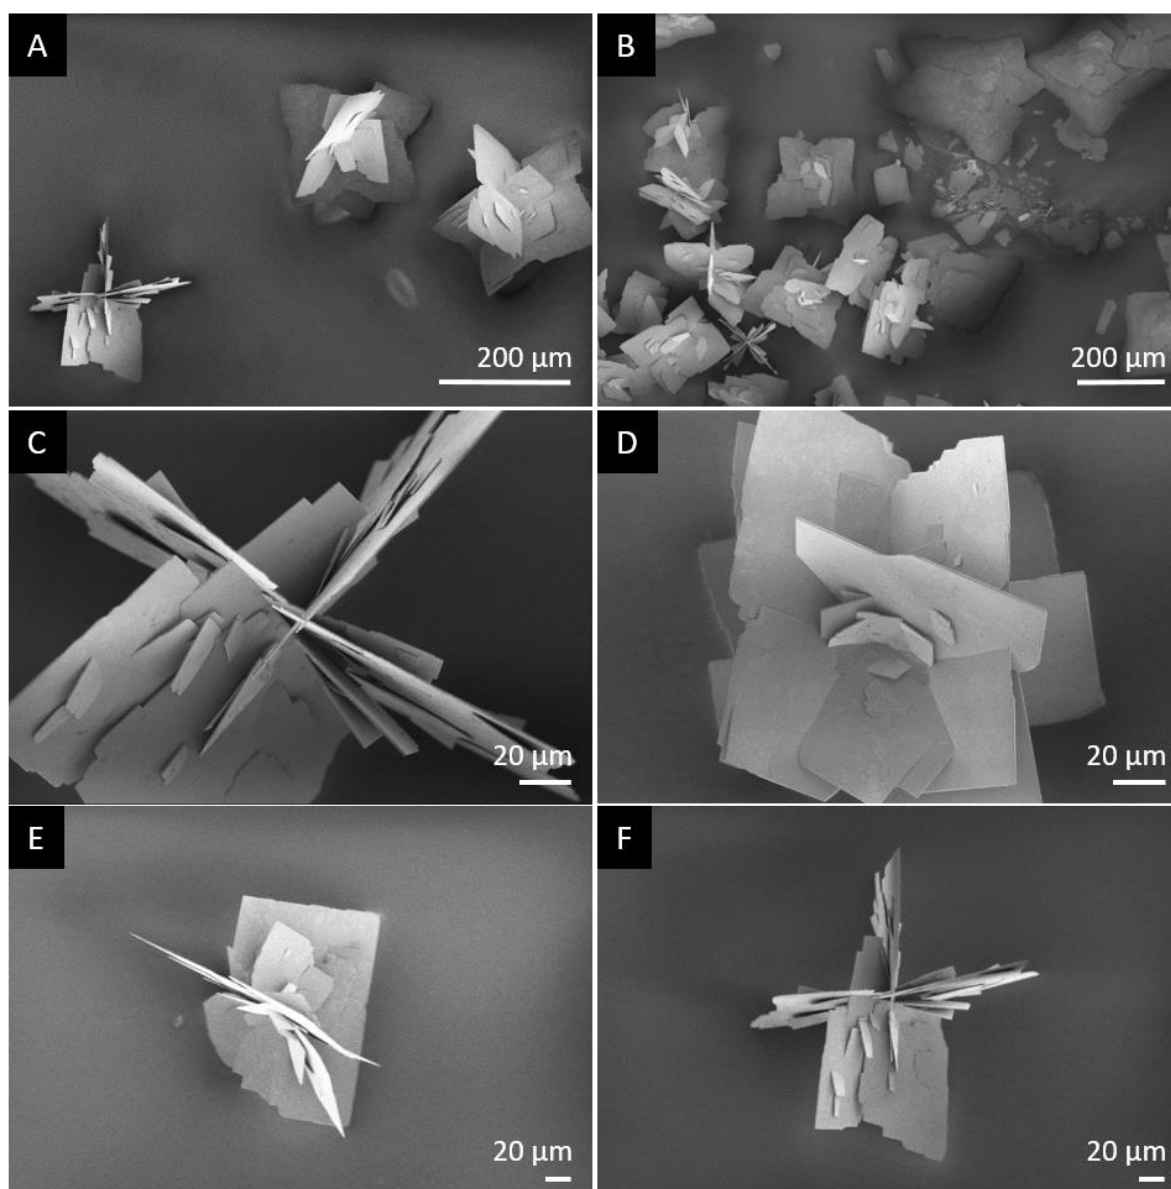

**Figure S6.** Synthesis of SnO microstructures in the presence of peptide segment SnBP01-1 (LPPW). SnO microstructures were mineralized in the presence of 1 nM peptide. Overview micrographs (A, B) and single SnO microstructures from different experiments (C - F) under the same reaction conditions.

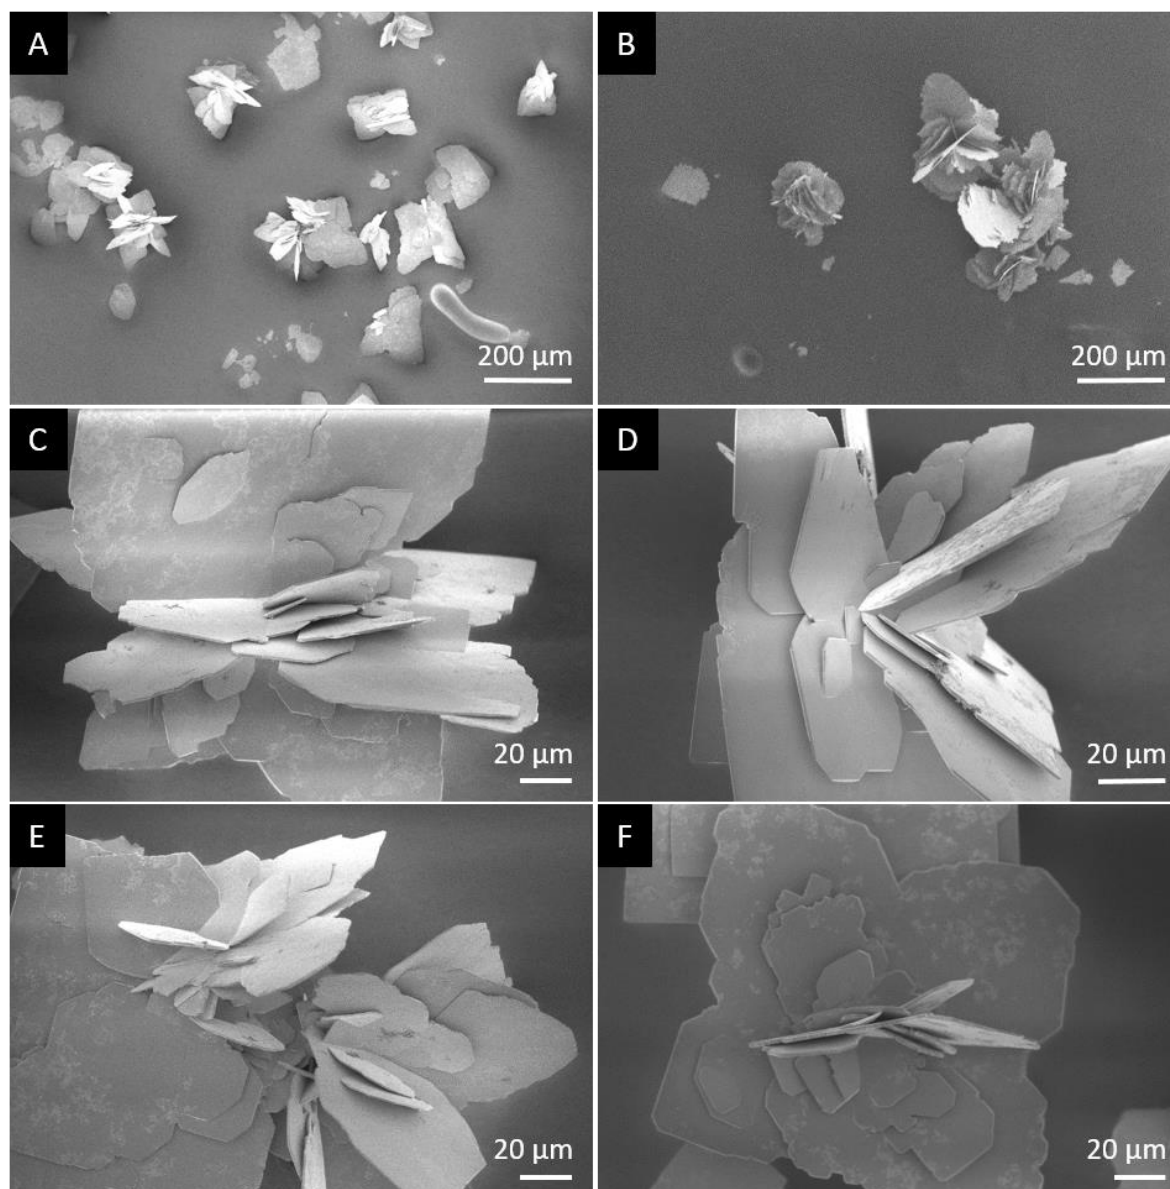

**Figure S7.** Synthesis of SnO microstructures in the presence of peptide segment SnBP01 (LPPWKLK). SnO microstructures were mineralized in the presence of 1 nM peptide. Overview micrographs (A, B) and single SnO microstructures from different experiments (C - F) under the same reaction conditions.
